# Supplementary material for: HPV integration hijacks and multimerizes a cellular enhancer to generate a viral-cellular super-enhancer that drives high viral oncogene expression
Source: PubMed Central journal article supplement (PMC5798845; doi:10.1371/journal.pgen.1007179), 2018-01-24

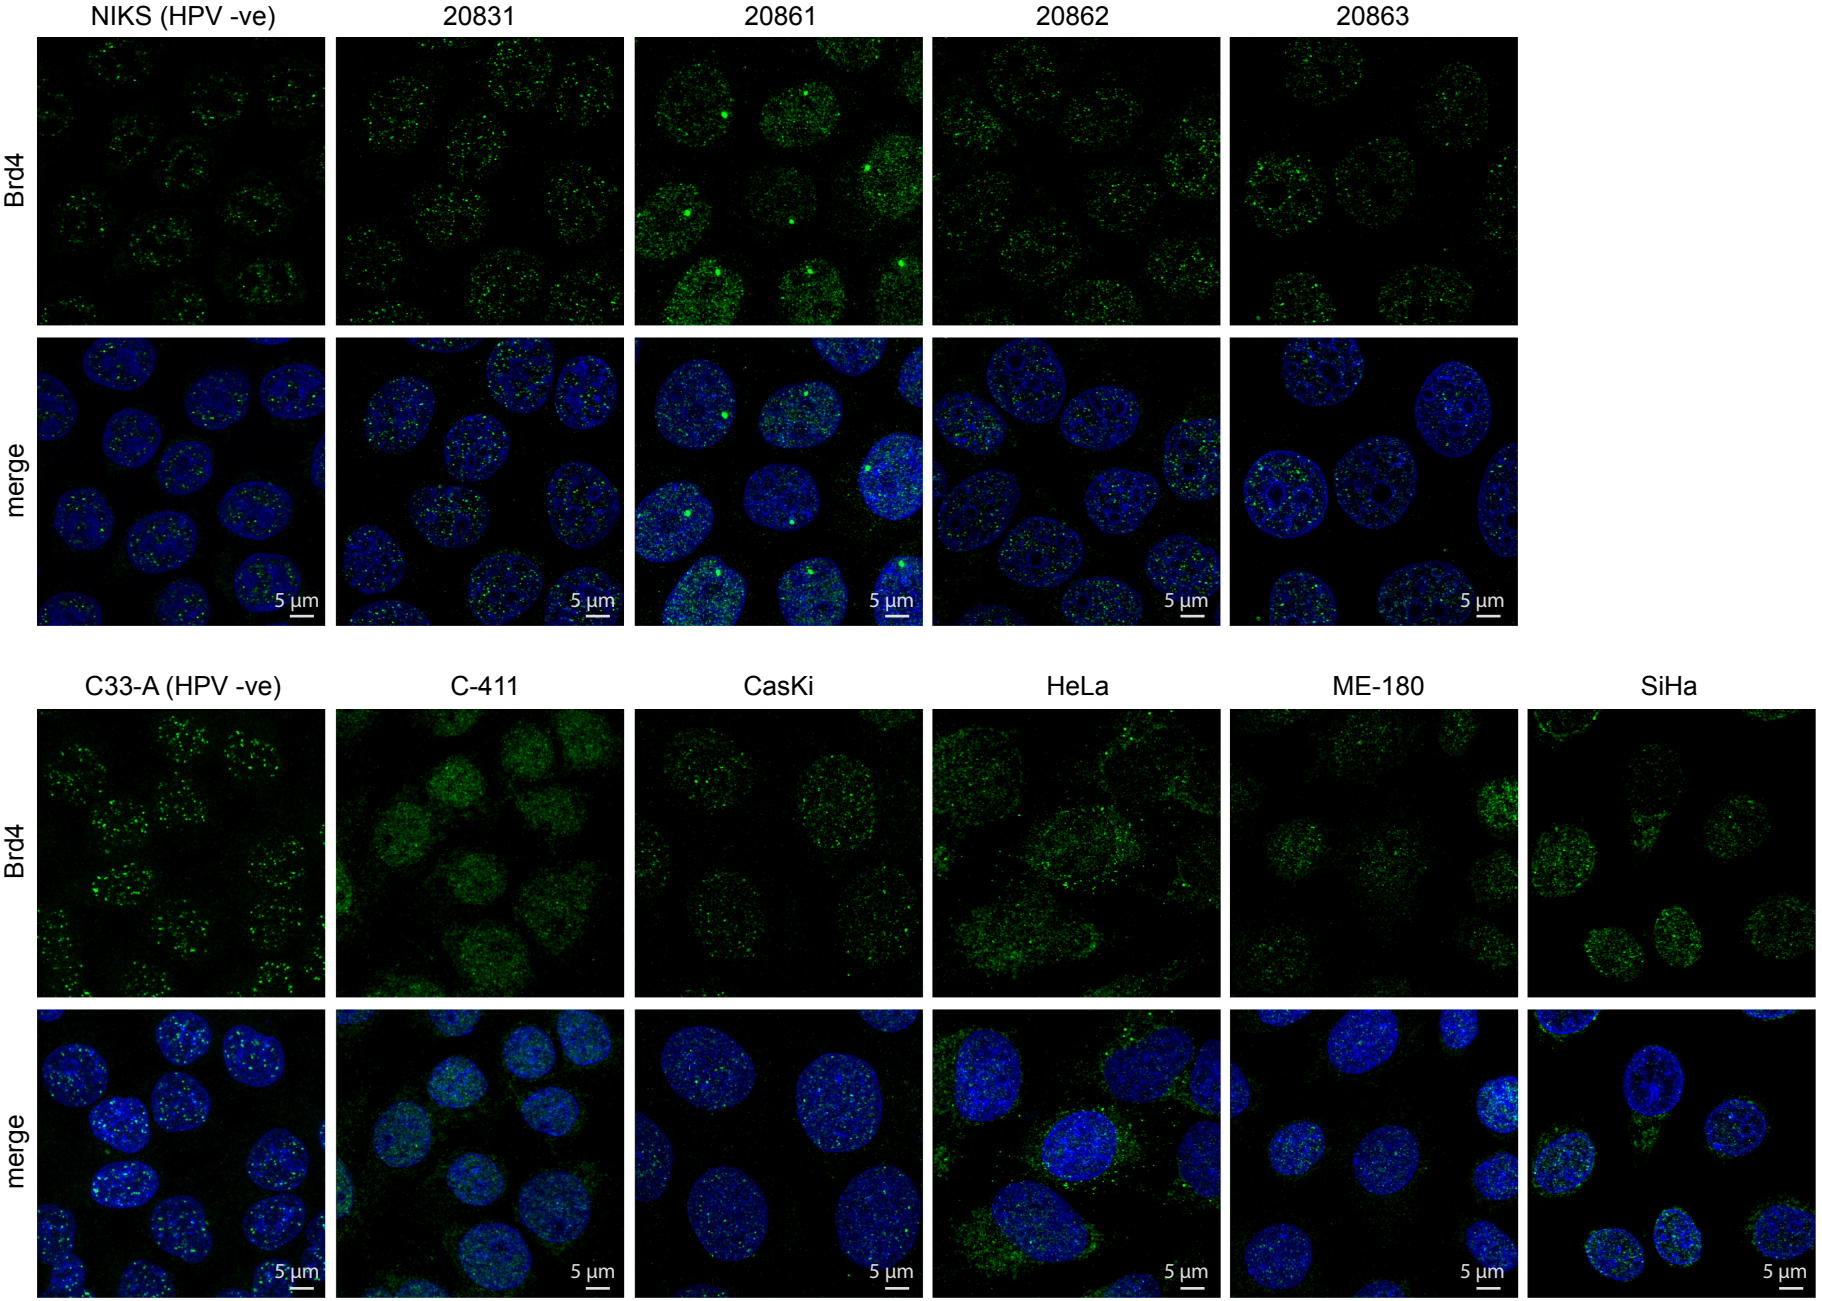

Supplement: pgen.1007179.s003.pdf [file pgen.1007179.s003.pdf]
