# Supplementary material for: HPV integration hijacks and multimerizes a cellular enhancer to generate a viral-cellular super-enhancer that drives high viral oncogene expression
Source: PubMed Central journal article supplement (PMC5798845; doi:10.1371/journal.pgen.1007179), 2018-01-24
Supplement: pgen.1007179.s008.pdf [file pgen.1007179.s008.pdf]

**S1 Table. HPV insertional breakpoints in 20861 and 20863 cells, detected by custom viral genome hybrid capture sequencing**

| Cell line    | Break ID  | Number of reads | Position (HPV16 genome) | HPV gene     | HPV read strand | Position (hg19)                | Host genome read strand | Neighboring host genes                                                                                                                  |
|--------------|-----------|-----------------|-------------------------|--------------|-----------------|--------------------------------|-------------------------|-----------------------------------------------------------------------------------------------------------------------------------------|
| 20861        | 6         | 7               | 2827-3062               | E2           | +               | chr2: 28595279-28595577        | +                       | AK055918                                                                                                                                |
| <b>20861</b> | <b>5</b>  | <b>338</b>      | <b>2505-3062</b>        | <b>E1/E2</b> | <b>+</b>        | <b>chr2: 28595311-28595730</b> | <b>+</b>                | <b>AK055918</b>                                                                                                                         |
| 20861        | 7         | 4               | 2173-2575               | E1           | +               | chr2: 28595585-28595729        | +                       | AK055918 (downstream 11.546 kb); FOSL2 (upstream 20.049 kb); BRE (downstream 33.818 kb)                                                 |
| <b>20861</b> | <b>10</b> | <b>616</b>      | <b>3151-3678</b>        | <b>E2/E4</b> | <b>-</b>        | <b>chr2: 28595716-28596131</b> | <b>-</b>                | <b>AK055918 (downstream 11.144 kb); FOSL2 (upstream 19.647 kb); BRE (downstream 33.949 kb)</b>                                          |
| 20861        | 12        | 4               | 3693-4038               | E2/E5        | -               | chr2: 28595741-28595968        | -                       | AK055918 (downstream 11.307 kb); FOSL2 (upstream 19.81 kb); BRE (downstream 33.974 kb)                                                  |
| 20861        | 11        | 12              | 3151-3435               | E2/E4        | -               | chr2: 28595896-28596474        | -                       | AK055918 (downstream 10.801 kb); FOSL2 (upstream 19.304 kb); BRE (downstream 34.129 kb)                                                 |
| 20861        | 18        | 4               | 3398-3727               | E2/E4        | -               | chr2: 33141274-33141664        | -                       | LINC00486; LOC100271832 (upstream 10.529 kb); LTBP1 (upstream 30.704 kb); TTC27 (downstream 95.156 kb)                                  |
| 20861        | 19        | 4               | 2634-2813               | E1/E2        | -               | chr2: 33141297-33141606        | -                       | LINC00486; LOC100271832 (upstream 10.587 kb); LTBP1 (upstream 30.762 kb); TTC27 (downstream 95.179 kb)                                  |
| 20861        | 20        | 9               | 276-1039                | E6/E7/E1     | -               | chr2: 33141300-33141691        | -                       | LINC00486; LOC100271832 (upstream 10.502 kb); LTBP1 (upstream 30.677 kb); TTC27 (downstream 95.182 kb)                                  |
| 20861        | 14        | 4               | 6649-7300               | L1/URR       | -               | chr2: 33141421-33141651        | -                       | LINC00486; LOC100271832 (upstream 10.542 kb); LTBP1 (upstream 30.717 kb); TTC27 (downstream 95.303 kb)                                  |
| 20861        | 16        | 5               | 4258-4862               | L2           | -               | chr2: 33141427-33141690        | -                       | LINC00486; LOC100271832 (upstream 10.503 kb); LTBP1 (upstream 30.678 kb); TTC27 (downstream 95.309 kb)                                  |
| 20861        | 26        | 8               | 2905-3288               | E2           | -               | chr7: 124000000-124000000      | +                       | TMEM229A (upstream 52.477 kb); SPAM1 (downstream 114.539 kb)                                                                            |
| 20861        | 24        | 12              | 2831-3093               | E2           | +               | chr7: 125000000-125000000      | +                       | LOC101928283 (downstream 67.402 kb); LOC101928254 (upstream 182.432 kb)                                                                 |
| 20861        | 28        | 9               | 2565-2976               | E1/E2        | -               | chr7: 125000000-125000000      | -                       | LOC101928283 (downstream 76.519 kb); LOC101928254 (upstream 191.549 kb)                                                                 |
| 20861        | 2         | 4               | 4212-4418               | L2           | -               | chr12: 80007755-80007807       | +                       | PAWR; MIR5692B (downstream 155.315 kb); PPP1R12A (downstream 159.535 kb); SYT1 (downstream 161.967 kb); MIR1252 (downstream 194.654 kb) |
| 20861        | 22        | 5               | 4173-4408               | L2           | -               | chr20: 52118023-52118075       | -                       | TSHZ2 (downstream 6.154 kb); LOC101927770 (upstream 51.233 kb)                                                                          |
| 20863        | 3         | 5               | 4177-4385               | L2           | -               | chr1: 22381406-22381464        | +                       | CDC42; LINC00339 (downstream 23.689 kb); LOC101928043 (upstream 28.865 kb)                                                              |
| 20863        | 7         | 4               | 4177-4633               | L2           | -               | chr1: 199440186-199440241      | -                       | LINC01222 (upstream 452.093 kb)                                                                                                         |
| 20863        | 38        | 12              | 578-1306                | E7/E1        | -               | chr2: 33141280-33141692        | -                       | LINC00486; LOC100271832 (upstream 10.501 kb); TTC27 (downstream 95.162 kb)                                                              |
| 20863        | 52        | 6               | 1884-2429               | E1           | -               | chr2: 33141285-33141624        | -                       | LINC00486; LOC100271832 (upstream 10.569 kb); TTC27 (downstream 95.167 kb)                                                              |
| 20863        | 48        | 9               | 7182-7781               | URR          | -               | chr2: 33141295-33141692        | -                       | LINC00486; LOC100271832 (upstream 10.501 kb); TTC27 (downstream 95.177 kb)                                                              |
| 20863        | 39        | 6               | 4865-5317               | L2           | -               | chr2: 33141298-33141679        | -                       | LINC00486; LOC100271832 (upstream 10.514 kb); TTC27 (downstream 95.18 kb)                                                               |
| 20863        | 41        | 8               | 36-583                  | URR/E6/E7    | -               | chr2: 33141299-33141662        | -                       | LINC00486; LOC100271832 (upstream 10.531 kb); TTC27 (downstream 95.181 kb)                                                              |
| 20863        | 44        | 11              | 4231-4810               | L2           | -               | chr2: 33141302-33141692        | -                       | LINC00486; LOC100271832 (upstream 10.501 kb); TTC27 (downstream 95.184 kb)                                                              |
| 20863        | 27        | 7               | 776-1370                | E7/E1        | +               | chr2: 33141312-33141692        | -                       | LINC00486; LOC100271832 (upstream 10.501 kb); TTC27 (downstream 95.194 kb)                                                              |
| 20863        | 45        | 4               | 3398-3629               | E2/E4        | -               | chr2: 33141327-33141680        | -                       | LINC00486; LOC100271832 (upstream 10.513 kb); TTC27 (downstream 95.209 kb)                                                              |
| 20863        | 40        | 7               | 6010-6406               | L1           | -               | chr2: 33141341-33141679        | -                       | LINC00486; LOC100271832 (upstream 10.514 kb); TTC27 (downstream 95.223 kb)                                                              |
| 20863        | 29        | 7               | 4253-4822               | L2           | +               | chr2: 33141417-33141670        | -                       | LINC00486; LOC100271832 (upstream 10.523 kb); TTC27 (downstream 95.299 kb)                                                              |
| 20863        | 30        | 5               | 2410-3029               | E1/E2        | +               | chr2: 33141419-33141678        | -                       | LINC00486; LOC100271832 (upstream 10.515 kb); TTC27 (downstream 95.301 kb)                                                              |
| 20863        | 37        | 14              | 5390-5960               | L2/L1        | -               | chr2: 33141421-33141692        | -                       | LINC00486; LOC100271832 (upstream 10.501 kb); TTC27 (downstream 95.303 kb)                                                              |
| 20863        | 23        | 4               | 7471-7894               | URR          | +               | chr2: 33141425-33141663        | -                       | LINC00486; LOC100271832 (upstream 10.53 kb); TTC27 (downstream 95.307 kb)                                                               |
| 20863        | 32        | 5               | 230-815                 | E6/E7        | +               | chr2: 33141430-33141670        | -                       | LINC00486; LOC100271832 (upstream 10.523 kb); TTC27 (downstream 95.312 kb)                                                              |
| 20863        | 31        | 5               | 3048-3796               | E2/E4        | +               | chr2: 33141446-33141672        | -                       | LINC00486; LOC100271832 (upstream 10.521 kb); TTC27 (downstream 95.328 kb)                                                              |
| 20863        | 42        | 10              | 2798-3514               | E1/E2/E4     | -               | chr2: 33141449-33141692        | -                       | LINC00486; LOC100271832 (upstream 10.501 kb); TTC27 (downstream 95.331 kb)                                                              |
| 20863        | 43        | 5               | 1299-1596               | E1           | -               | chr2: 33141457-33141688        | -                       | LINC00486; LOC100271832 (upstream 10.505 kb); TTC27 (downstream 95.339 kb)                                                              |
| 20863        | 51        | 6               | 6531-6940               | L1           | -               | chr2: 33141468-33141648        | -                       | LINC00486; LOC100271832 (upstream 10.545 kb); TTC27 (downstream 95.35 kb)                                                               |
| 20863        | 24        | 4               | 5752-6286               | L1           | +               | chr2: 33141477-33141653        | -                       | LINC00486; LOC100271832 (upstream 10.54 kb); TTC27 (downstream 95.359 kb)                                                               |

|       |    |    |           |       |   |                           |   |                                                                                                                                                                                                                          |
|-------|----|----|-----------|-------|---|---------------------------|---|--------------------------------------------------------------------------------------------------------------------------------------------------------------------------------------------------------------------------|
| 20863 | 46 | 4  | 2511-2864 | E1/E2 | - | chr2: 33141524-33141690   | - | LINC00486; LOC100271832 (upstream 10.503 kb); TTC27 (downstream 95.406 kb)                                                                                                                                               |
| 20863 | 25 | 4  | 6354-6693 | L1    | + | chr2: 33141527-33141692   | - | LINC00486; LOC100271832 (upstream 10.501 kb); TTC27 (downstream 95.409 kb)                                                                                                                                               |
| 20863 | 59 | 8  | 2788-3018 | E1/E2 | + | chr3: 186507881-186508213 | - | RFC4; EIF4A2 (downstream 0.196 kb); SNORA4 (downstream 2.343 kb); SNORA63 (downstream 2.659 kb); SNORA81 (downstream 3.240 kb); MIR1248 (downstream 3.315 kb); SNORD2 (downstream 5.227 kb); ADIPOQ (upstream 52.249 kb) |
| 20863 | 66 | 5  | 4174-4363 | L2    | - | chr8: 38059390-38059439   | + | BAG4; LSM1 (upstream 25.142 kb); PPAPDC1B (downstream 61.21 kb)                                                                                                                                                          |
| 20863 | 10 | 5  | 4178-4491 | L2    | - | chr11: 57805154-57805208  | + | OR9Q1; OR6Q1 (downstream 5.776 kb); OR9Q2 (upstream 152.697 kb)                                                                                                                                                          |
| 20863 | 13 | 7  | 4187-4722 | L2    | - | chr12: 66451369-66451445  | + | MIR6074 (upstream 33.863 kb); LLPH (downstream 65.403 kb)                                                                                                                                                                |
| 20863 | 14 | 11 | 4177-4618 | L2    | - | chr12: 80007753-80007807  | + | PAWR; MIR5692B (downstream 155.313 kb)                                                                                                                                                                                   |
| 20863 | 15 | 5  | 4174-4444 | L2    | - | chr15: 32767594-32767649  | - | GOLGA80 (upstream 19.759 kb); WHAMMP1 (downstream 44.399 kb)                                                                                                                                                             |
| 20863 | 17 | 7  | 6645-6877 | L1    | - | chr17: 47285978-47286154  | + | GNGT2; ABI3 (upstream 1.434 kb); PHOSPHO1 (downstream 14.577 kb)                                                                                                                                                         |
| 20863 | 20 | 4  | 4179-4470 | L2    | - | chr19: 7124552-7124609    | - | INSR; ZNF557 (downstream 36.574 kb); MBD3L3 (upstream 65.907 kb)                                                                                                                                                         |
| 20863 | 56 | 4  | 6420-6639 | L1    | - | chr20: 15285794-15286003  | - | MACROD2; MACROD2-AS1 (upstream 375.63 kb)                                                                                                                                                                                |
| 20863 | 57 | 12 | 4176-4459 | L2    | - | chr20: 52118023-52118075  | - | TSHZ2 (downstream 6.154 kb); LOC101927770 (upstream 51.233 kb)                                                                                                                                                           |
| 20863 | 75 | 5  | 4202-4689 | L2    | - | chrX: 113975931-113975990 | - | HTR2C; MIR1911 (upstream 21.753 kb); MIR1298 (downstream 26.17 kb)                                                                                                                                                       |
