# Supplementary material for: HPV integration hijacks and multimerizes a cellular enhancer to generate a viral-cellular super-enhancer that drives high viral oncogene expression
Source: PubMed Central journal article supplement (PMC5798845; doi:10.1371/journal.pgen.1007179), 2018-01-24
Supplement: pgen.1007179.s009.pdf [file pgen.1007179.s009.pdf]

**S2 Table. Primer sequences used for APOT assay, ChIP-qPCR and generation of FISH probe**

| Primer               | Sequence (5'→3')                     | Purpose                                                                                                                                 | Product length (bp) |
|----------------------|--------------------------------------|-----------------------------------------------------------------------------------------------------------------------------------------|---------------------|
| Amplicon 1F          | TAAACGAGGGCAGAGAGAGC                 | Probe against 20861 amplified cellular flanking sequence                                                                                | 2,184               |
| Amplicon 1R          | CAGGCCCTGTCTAAGCACT                  |                                                                                                                                         |                     |
| Amplicon 2F          | CCCAGAATCTGAGCCAAGCA                 | Probe against 20861 amplified cellular flanking sequence                                                                                | 2,191               |
| Amplicon 2R          | TCATCCCCGGGAATCTGACT                 |                                                                                                                                         |                     |
| Amplicon 3F          | AAAACAGGCTGGTGGGAACA                 | Probe against 20861 amplified cellular flanking sequence                                                                                | 2,473               |
| Amplicon 3R          | TTTTGCCCCCACTGACAACCT                |                                                                                                                                         |                     |
| Amplicon 4F          | TGTTTCCCTATCCACGGTGC                 | Probe against 20861 amplified cellular flanking sequence                                                                                | 2,442               |
| Amplicon 4R          | GTGGGGTCATGACTTGGAGG                 |                                                                                                                                         |                     |
| Amplicon 5F          | CCGATGCTGTTGATTAGAGGC                | Probe against 20861 amplified cellular flanking sequence                                                                                | 2,377               |
| Amplicon 5R          | ATTGGGCACACACATTTGC                  |                                                                                                                                         |                     |
| Amplicon 6F          | ACCTGTCTCTCCCCATCC                   | Probe against 20861 amplified cellular flanking sequence                                                                                | 2,396               |
| Amplicon 6R          | CCTCTCTGCCCAACAGAG                   |                                                                                                                                         |                     |
| Amplicon 7F          | GATCATTGAACGAGGCACGC                 | Probe against 20861 amplified cellular flanking sequence                                                                                | 2,497               |
| Amplicon 7R          | TGCCTTGAATCAGGGGCAG                  |                                                                                                                                         |                     |
| Amplicon 8F          | CTGCGAGCTCTGAGAGAGAC                 | Probe against 20861 amplified cellular flanking sequence                                                                                | 2,035               |
| Amplicon 8R          | TGGTGGCTCTGTTATCTGCG                 |                                                                                                                                         |                     |
| Amplicon 9F          | CTGTGTGCTTTAGGGGCGT                  | Probe against 20861 amplified cellular flanking sequence                                                                                | 2,181               |
| Amplicon 9R          | TTGATGGGATTGCCCTGGGAC                |                                                                                                                                         |                     |
| APOT 20861_P1        | CGGACAGAGCCATTACAAT                  | To determine viral-cellular junction transcript in 20861 cells by amplification of papillomavirus oncogene transcripts, APOT (see (30)) | -                   |
| Linker sequence (P3) | GACTCGAGTCGACATCG                    |                                                                                                                                         |                     |
| APOT 20861_P2        | CCTTTTGTGCAAGTGTGACTCTACG            |                                                                                                                                         |                     |
| Oligo(dT)17-P3       | GACTCGAGTCGACATCGATTTTTTTTTTTTTTTTTT |                                                                                                                                         |                     |
| F flank seq F        | TCGCCACCAGCCTTAGCA                   | To determine copy number of cellular flanking sequence at chr2 20861 integration site                                                   | 114                 |
| F flank seq R        | AATGCCAGCTGATAAATGTAGAGTGAGTG        |                                                                                                                                         |                     |
| ACTB F               | TCGTCCACGCAAATGC                     | Normalization gene; copy number analysis of cellular flanking sequence at chr2 20861 integration site                                   | 76                  |
| ACTB R               | CGCAAGTTAGGTTTTGTCAAGAAA             |                                                                                                                                         |                     |
| URR F                | TTCGGTTGCATGCTTTTTGGCACA             | ChIP-qPCR                                                                                                                               | 97                  |
| URR R                | CACGCATGGCAAGCAGGAAACGTAC            |                                                                                                                                         |                     |
| L1 F                 | GGCTGCCTAGTGAGGCCACTG                | ChIP-qPCR                                                                                                                               | 79                  |
| L1 R                 | GCGTGCAACATATTCATCCGTGC              |                                                                                                                                         |                     |
| E2 F                 | CGCCGCGACCATAACCAAG                  | ChIP-qPCR                                                                                                                               | 93                  |
| E2 R                 | GGGGTTTCCGGTGTCTGGCT                 |                                                                                                                                         |                     |
| IGLL5 F              | CTTGAGGATTGCAGATGGGC                 | ChIP-qPCR; negative control for super-enhancer                                                                                          | 77                  |
| IGLL5 R              | TGACCCTGATCCTGACCCTA                 |                                                                                                                                         |                     |
| CCND2 F              | CCTTCTGCTCCACCTTCTCT                 | ChIP-qPCR; positive control for super-enhancer                                                                                          | 76                  |
| CCND2 R              | CTGACCTCCTCTTTGGCT                   |                                                                                                                                         |                     |
| FOSL1 F              | AACGTCCTGTTCCATTCT                   | ChIP-qPCR; positive control for super-enhancer                                                                                          | 92                  |
| FOSL1 R              | GGCAGAGCTAGAACCCACTT                 |                                                                                                                                         |                     |
| PPIA F               | AGAATTCATCCTAAAGCATAACGG             | RT-qPCR; normalization gene                                                                                                             | 121                 |
| PPIA R               | TGCTTGCCATCCAACCACTC                 |                                                                                                                                         |                     |
| E6*1 F               | ACAGTTACTGCGACGTGAGGTG               | RT-qPCR                                                                                                                                 | 56                  |
| E6*1 R               | TTCTTCAGGACACAGTGG                   |                                                                                                                                         |                     |
| 20861 fusion F       | TCTACCATGGCTGATCCTGCAGGTATGT         | RT-qPCR; viral-host fusion mRNA at chr2 integration site in 20861 cells                                                                 | 105                 |
| 20861 fusion R       | GAGTCATCAAACGATGCTAAGGCTGGTG         |                                                                                                                                         |                     |
| 20831/62 fusion F    | GCTTTGTAATCAGATGGGATATTATG           | RT-qPCR; viral-host fusion mRNA at chr3 integration site in 20831 and 20862 cells                                                       | 84                  |
| 20831/62 fusion R    | TTGTACATTGTATACTGCAGTGTCTG           |                                                                                                                                         |                     |
